# Supplementary material
Source: ML conference proceedings conference paper supplement (https://openaccess.thecvf.com/content/cvpr_2017/html/Zeng_Agent-Centric_Risk_Assessment_2017_CVPR_paper.html)
Supplement: Supplementary file 1 [file Zeng_Agent-Centric_Risk_Assessment_2017_CVPR_supplemental.pdf]

Archive with 5 entries (4 files):
- 0799-supp.mov
- __MACOSX/
- __MACOSX/._0799-supp.mov
- 0799-supp.pdf
- __MACOSX/._0799-supp.pdf
