# Supplementary material
Source: ML conference proceedings conference paper supplement (https://openaccess.thecvf.com/content/cvpr_2017/html/Zeng_Agent-Centric_Risk_Assessment_2017_CVPR_paper.html)
Supplement: Supplementary file 1 [file Zeng_Agent-Centric_Risk_Assessment_2017_CVPR_supplemental.pdf › 0799-supp.pdf]

# Agent-Centric Risk Assessment: Accident Anticipation and Risky Region Localization

## Technical Report

Kuo-Hao Zeng<sup>\*†</sup> Shih-Han Chou<sup>\*</sup> Fu-Hsiang Chan<sup>\*</sup> Juan Carlos Niebles<sup>†</sup> Min Sun<sup>\*</sup>

<sup>†</sup>Stanford University <sup>\*</sup>National Tsing Hua University

{khzeng, jniebles}@cs.stanford.edu {happy810705, corgi1205}@gmail.com sunmin@ee.nthu.edu.tw

### 1. Online tracking-by-detection for agent tracks

We outline the training process in Section 3.6 of the main paper. In particular, we describe the use of noisy agent information for training, which comes from adopting on-line tracking-by-detection (TD) to obtain candidate agent tracks. Instead of using ground truth agent information during training, the use of noisy tracks better reflects the challenge of handling noisy agent information during testing.

In detail, we first fine-tune faster R-CNN [3] on the training set of EF and SA datasets, which we use to propose 300 regions for each frame. Then, we use the 30 region proposals with top object scores as initial boxes. We further retrieve the top 50 boxes from the 300 region proposals in the next frame for each track by computing IoU scores. Then, the top one box is selected by the highest cosine similarity in feature space (*pooling 5 with Global average pooling*) to the selected box in current frame for each track. When more than one track ends in highly overlapping boxes in the last frame, we only keep the one track from the group with highest average object score.

During training, we randomly select one agent track from the set consisting of the annotated agent tracks and the automatically generated TD tracks in each epoch. For each video, we treat the selected track as a positive/negative agent for the positive/negative example. During testing, no annotations are available to the model, so we only use TD tracks. We follow the same procedure when evaluating the accident anticipation and risky region localization. For each video, we apply our method to obtain per frame accident anticipation probability for each candidate agent track. At each frame, we take the maximum probability as the video-level anticipation probability. Then, we take the estimated riskiness of regions from the agent with maximum accident probability as the final per frame riskiness.

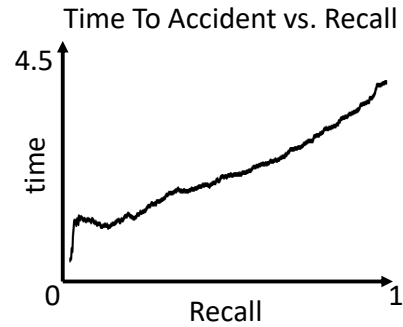

Figure 1. Time-to-Accidents vs. Recall. Higher recall results in higher TTA and vice versa. We simply average TTA across different recall, named as ATTA, as the summarization for TTA-Recall curve.

### 2. Average Time to Accident (ATTA)

In Section 5.1 of the main paper, we introduce Time-to-accident (TTA) and its averaged version (ATTA) to evaluate how early the model is able to predict an accident. We also indicate the relation between TTA and the threshold  $\gamma$  on accident anticipation probability. Here, we provide more details on the relation between TTA and  $\gamma$  and deduce the definition of average-TTA (ATTA).

Recall that for a given  $\gamma$ , we can compute one precision-recall operating point. Similarly, we can compute TTA for each recalled positive video given a specific  $\gamma$ . Thus, we can plot a TTA against Recall as in Fig. 1. From Fig. 1, we find that higher recall (obtained with low  $\gamma$ ) results in higher TTA and vice versa. To summarize all TTAs obtained with the various  $\gamma$  settings (each producing different recall), we simply average TTA across recall. Therefore, if the ATTA value is higher, the model can anticipate the accident earlier.

### 3. Backpropagation for the imagining layer

Recall that we introduce the imagining layer in our system in the main paper. The imagining layer can simulate the

| Statistics   | Positive |       |              |                 | Negative |       |              |                 | Total  |
|--------------|----------|-------|--------------|-----------------|----------|-------|--------------|-----------------|--------|
| Items        | #video   | agent | risky region | annotation type | #video   | agent | risky region | annotation type | #video |
| training set | 1000     | v     | v            | every 15 frame  | 1000     | v     | x            | every 15 frame  | 2000   |
| testing set  | 609      | v     | v            | every frame     | 491      | v     | x            | every frame     | 1000   |

Table 1. VA dataset statistics

future location of the agent according to current system status and feedforward the Agent-Region Interaction module to obtain a new accident anticipation probability and multiple risky region locations of the current frame. This simulation improves the performance on both accident anticipation and risky region localization according to Table 1 and 2 in the main paper, respectively. Here, we provide the detail of backpropagation of the imagining layer.

In the main paper, Eq. 17 is an overall loss function for accident anticipation, risky region localization and imagining of the location of an agent in the future. Taking Agent-RNN ( $RNN_A$ ), a Recurrent Neural Network for appearance feature of the agent, as an example, the loss function for accident anticipation can be backpropagated through Eq. 5, Eq. 6, Eq. 7, Eq. 1 and Eq. 2 in the main paper for non-imagining step.

For imagining step, we take the next  $t + k$  frame as our imagining target frame so that our system can imagine the location of the agent at time  $t + k$ . As a result, the loss function for accident anticipation can be backpropagated through Eq. 5, Eq. 6, Eq. 7, Eq. 1, Eq. 2, Eq. 9 and Eq. 8 in the main paper to time equal  $t$ . Then we compute a weighted sum over the gradients produced by imagining step and the gradient produced by non-imagining step according to the loss function depicted in Eq. 17 in the main paper.

The gradients for other model parameters can also be computed in a similar manner. We use Adam [1] as our optimization approach. The combination of an imagining layer with recurrent neural network creates a novel idea for handling data with temporal information. We leave the deeper exploitation of it as a future work.

#### 4. Analysis for EF dataset

In Section 4.1 in the main paper, we introduce a new large-scale Epic Fail (EF) dataset. The raw videos in this dataset are harvested from YouTube channels. It consists of 3000 viral videos capturing various accidents. In total, we have 1609 positive videos annotated as accident videos, while the rest are negative videos without accidents. In practice, we categorize each accident video into 7 failure classes, each agent into 17 object classes and each risky region into 63 object classes. The statistics of the VA dataset and the details of all classes are presented in found in Table 1 and Table 2, respectively. Although all these ground truth data are available, our method only requires annotations for

|               | Classes                                                                                                                                                                                                                                                                                                                                                                                                                                                                                               |
|---------------|-------------------------------------------------------------------------------------------------------------------------------------------------------------------------------------------------------------------------------------------------------------------------------------------------------------------------------------------------------------------------------------------------------------------------------------------------------------------------------------------------------|
| Failure event | crash, fall, bump, hit, turnover, hurt, burned                                                                                                                                                                                                                                                                                                                                                                                                                                                        |
| Agent         | bike, board, car, motorcycle, motorcyclist, person, pushups device, skateboarder, skier, sledge, swim ring, toy, couch, tricycle, unicycle, air raft                                                                                                                                                                                                                                                                                                                                                  |
| Risky region  | ball, balloon, bar, barrier, basket, bed, bike, bookshelf, bridge, canvas, car, ceiling, chair, corner, cylinder, dumbbells, edge, fence, fitness equipment, glass, ground, gun, handrail, heap, hole, horse, jumping pit, motorcycle, mud, obstacle, pad, person, plank, platform, pole, rock, rope, ropeswing, roundabout, scooter, seasaw, shovel, skateboard, slope, snow, springboard, stair, stilts, stool, straw, swing, toy, trampoline, treadmill, tree, tricycle, vaulting box, wall, water |

Table 2. Classes for failure event, agent and risky region in EF dataset.

the agent track, the risky region localization and the time that accident event happens for training. In testing time, our method only uses a raw image for each time as the input data.

The annotation protocol for EF dataset can be found in Fig. 2. We first annotate positive examples (Accident Observation duration) with  $N$  frames in videos. Further, to make sure that negative examples (Non-Accident Observation duration) have enough margin to the positive examples, we sample negative examples  $K$  frames before or after the positive examples. The number of frames of negative examples are set as  $N$ , too. If those sampled negative examples have the apparent risk phenomenon, the annotator would reject it.

For each frame, we manually use bounding boxes and segmentation masks to annotate the agent (green color in Fig. 3) and risky region (orange color in Fig. 3). The whole annotation process is done with the iSeg tool [4]. Even though with the help of the annotation tool, annotating is

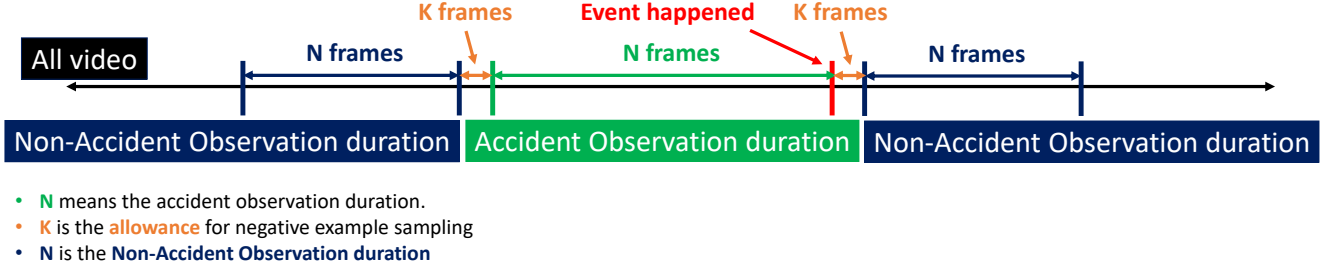

Figure 2. Annotation protocol. The green color means accident video segment (Accident Observation duration) and the blue color means non-accident video segment (Non-Accident Observation duration). For consistent, we make accident video segment and the non-accident video segment in the same length ( $N$  frames). To make sure that non-accident video segment has enough margin to the accident video segment, we make  $N$  frames gap between them.

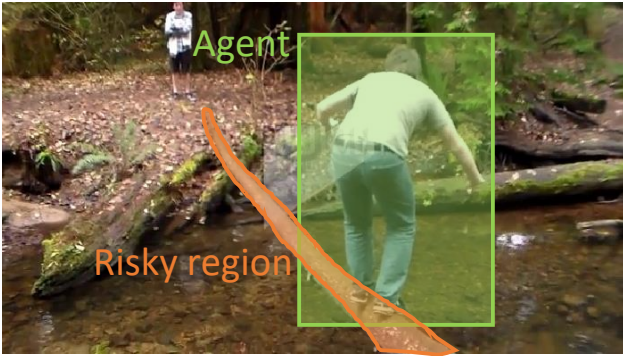

Figure 3. Annotation for the agent and risky region. The green box shows the agent and the orange box shows the risky region.

still time-consuming. Thus, testing data is carefully annotated at every frame, but training data is only annotated at every 15 frames. We transform the segmentation masks for each risky region into a bounding box for evaluation purposes.

## 5. Risk Map Visualization

The Agent-Region Interaction module of our framework outputs a risk score  $s$  for each candidate risk region proposal. Since the risk score  $s$  is produced by a sigmoid function, it corresponds to the risk probability for each proposal. Higher riskiness means that the proposal is riskier with respect to the agent. As a result, it raises an interesting question which is "Can we know the distribution of risk of the environment with respect to the agent?". We tackle it by utilizing riskiness of every proposal to visualize the risk map for each frame.

For the risk map shown in the qualitative results in the main paper and Fig. 4, Fig. 5, Fig. 6, and Fig. 7, we use the "imagesc" tool in Matlab [2] to draw risk maps. In detail, we generate risk maps by averaging the risk probability for each pixel over all covering candidate risky region

proposals. For visualization purposes, we standardize the color scale and range used to display the heatmaps. This enables easier comparison of heatmaps produced in different videos. To do this, we first compute the highest risk probability in the testing set for each dataset. Then, we set it as the upper bound when we use the "imagesc" tool to generate risk maps. This setting helps us visualizing the results with bright color for higher risk probability and dark color for lower risk probability.

## 6. Additional Qualitative Results

**EF dataset** We show more qualitative results in Fig. 4, Fig. 5 and Fig. 6, where are results for positive examples, negative examples and failure examples. In the positive examples and some failure examples, we use orange bounding boxes to show the annotated risky region. We also show the  $TTA$  measurement for all the positive examples and some failure examples. We describe the detail of the examples in the caption.

**SA dataset** We show qualitative results for SA dataset in Fig. 7. The first and second one are positive examples. The third and fourth one are negative examples. The last one is a failure case. We describe the detail of the examples in the caption.

## References

- [1] D. P. Kingma and J. Ba. Adam: A method for stochastic optimization. In *ICLR*, 2015. 2
- [2] MATLAB. version 7.10.0 (R2010a). The MathWorks Inc., Natick, Massachusetts, 2010. 3
- [3] S. Ren, K. He, R. Girshick, and J. Sun. Faster r-cnn: Towards real-time object detection with region proposal networks. In *NIPS*, 2015. 1
- [4] J. Schöning, P. Faion, and G. Heidemann. Pixel-wise ground truth annotation in videos. In *ICPRAM*, 2016. 2

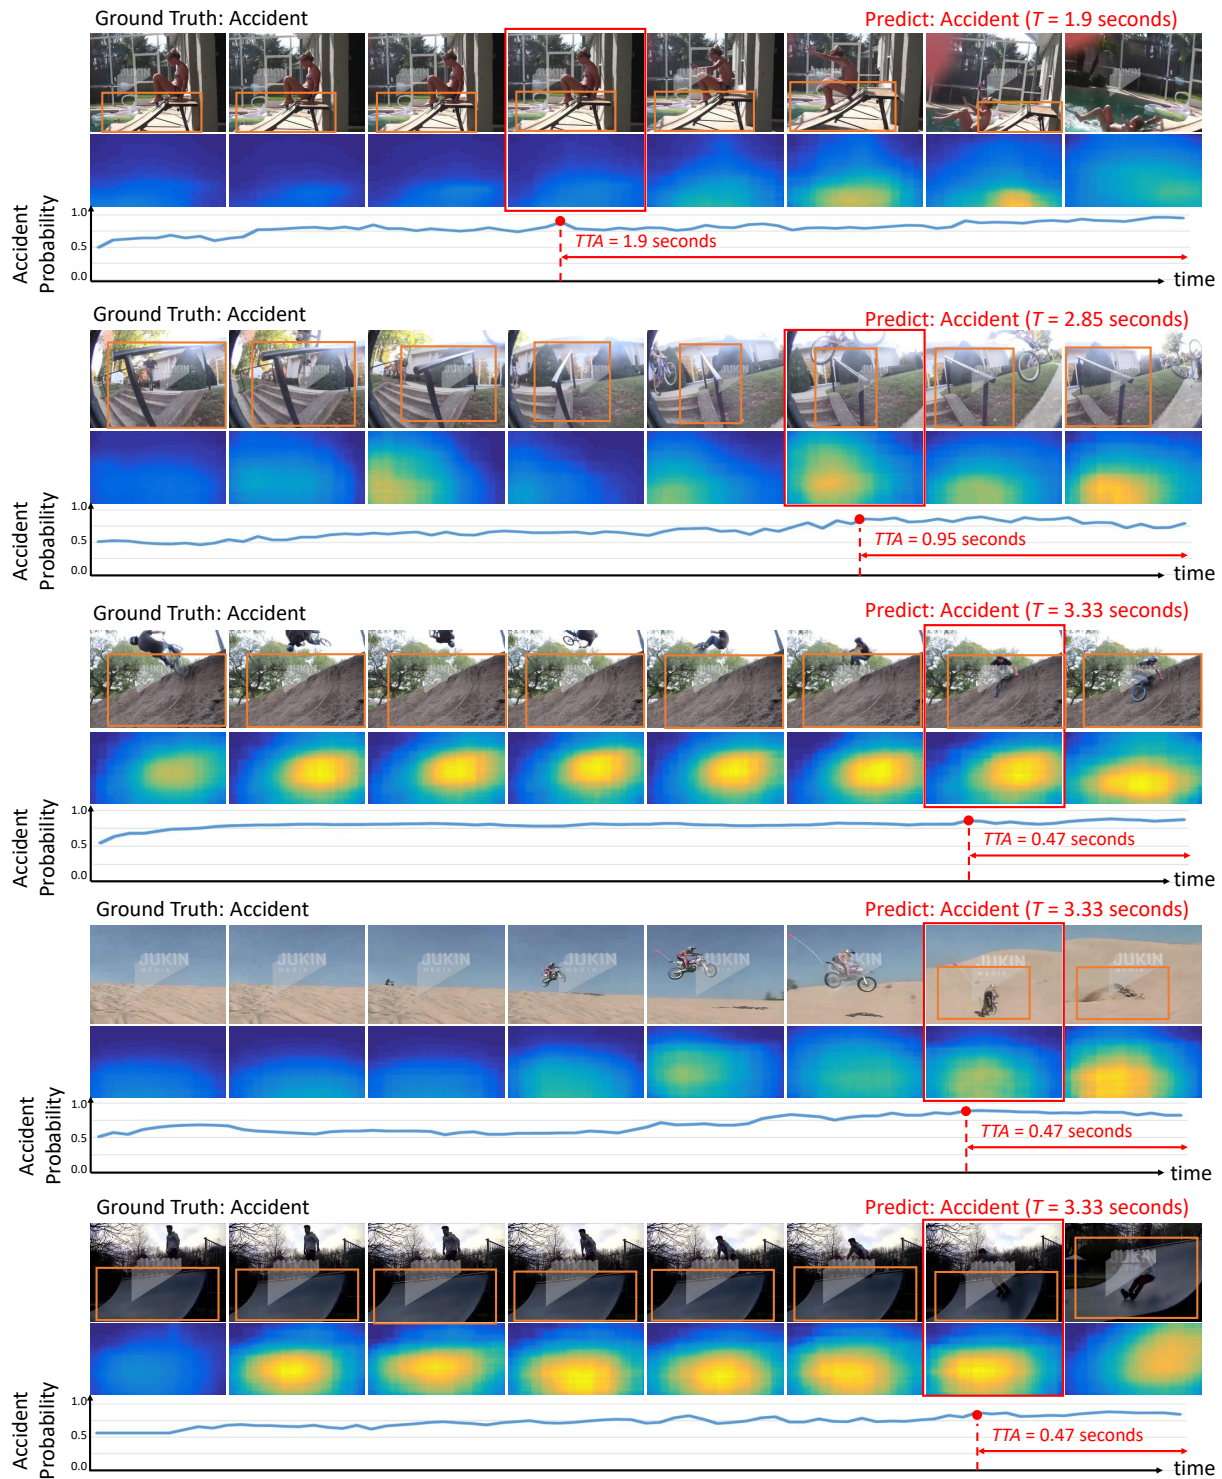

Figure 4. Qualitative Results for positive examples. We set 0.9 as the threshold for triggering accident anticipation. The accident anticipation probability (bottom row), the heat map (yellow for high risk and blue for low risk) for the risky regions (middle row) and ground truth risky region (orange box in top row) are shown in each example. For risk map, we average risk confidences of covering boxes for each pixel and draw the map by using Matlab [19] "imagesc" tool.

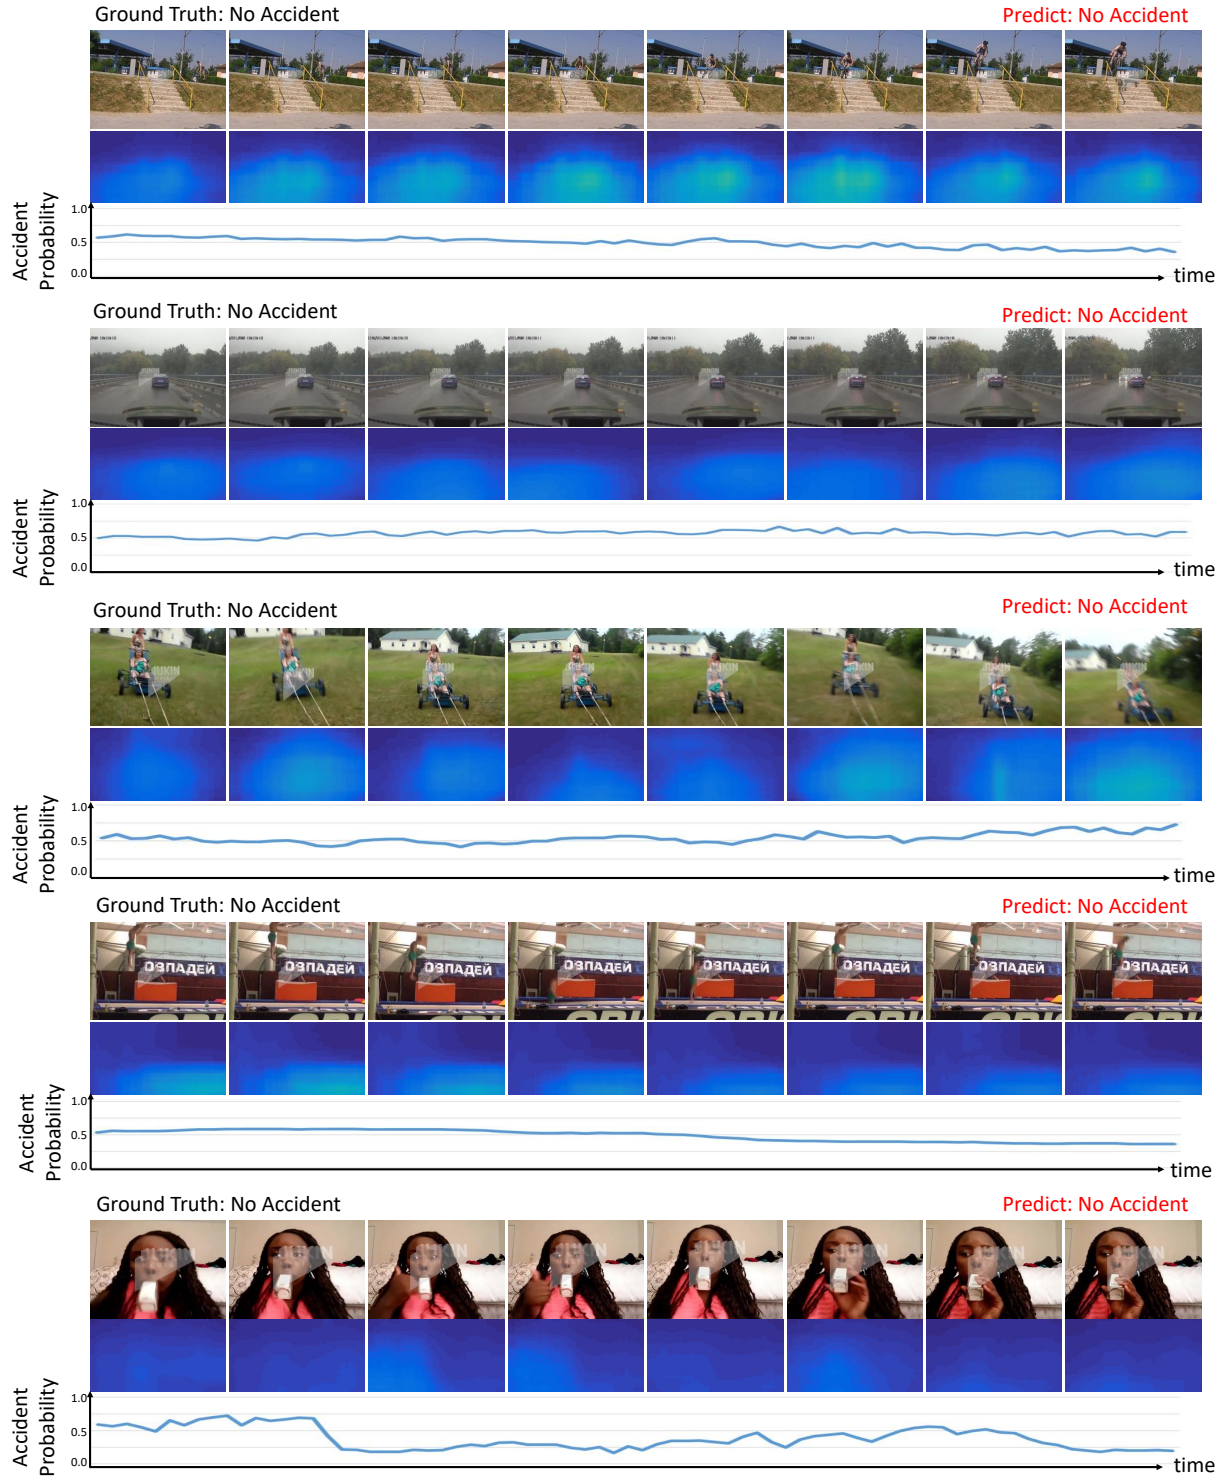

Figure 5. Qualitative Results for negative examples. For negative examples, the settings and the arrangement of the figure are the same as the positive examples in Fig. 4. We can clearly see that the colors of the risk map here are dim so that the model can easily recognize there is no accident event involved in the videos.

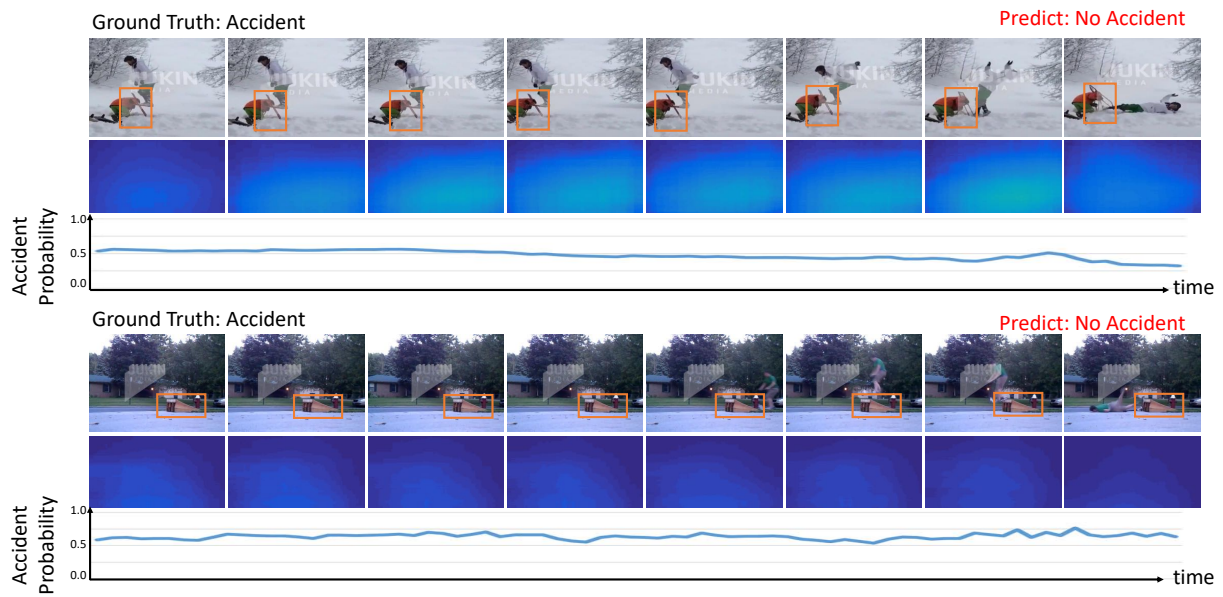

Figure 6. Qualitative Results for failure examples. The reason for failure for the first one is that the model does not recognize the risky region because the risky region (a chair) is similar to the sticks in the background. The reason for failure for the second one is that the color of the agent is similar to the background (the house in brown color). Therefore, the model confuses to recognize where is the risky region and results in the wrong prediction.

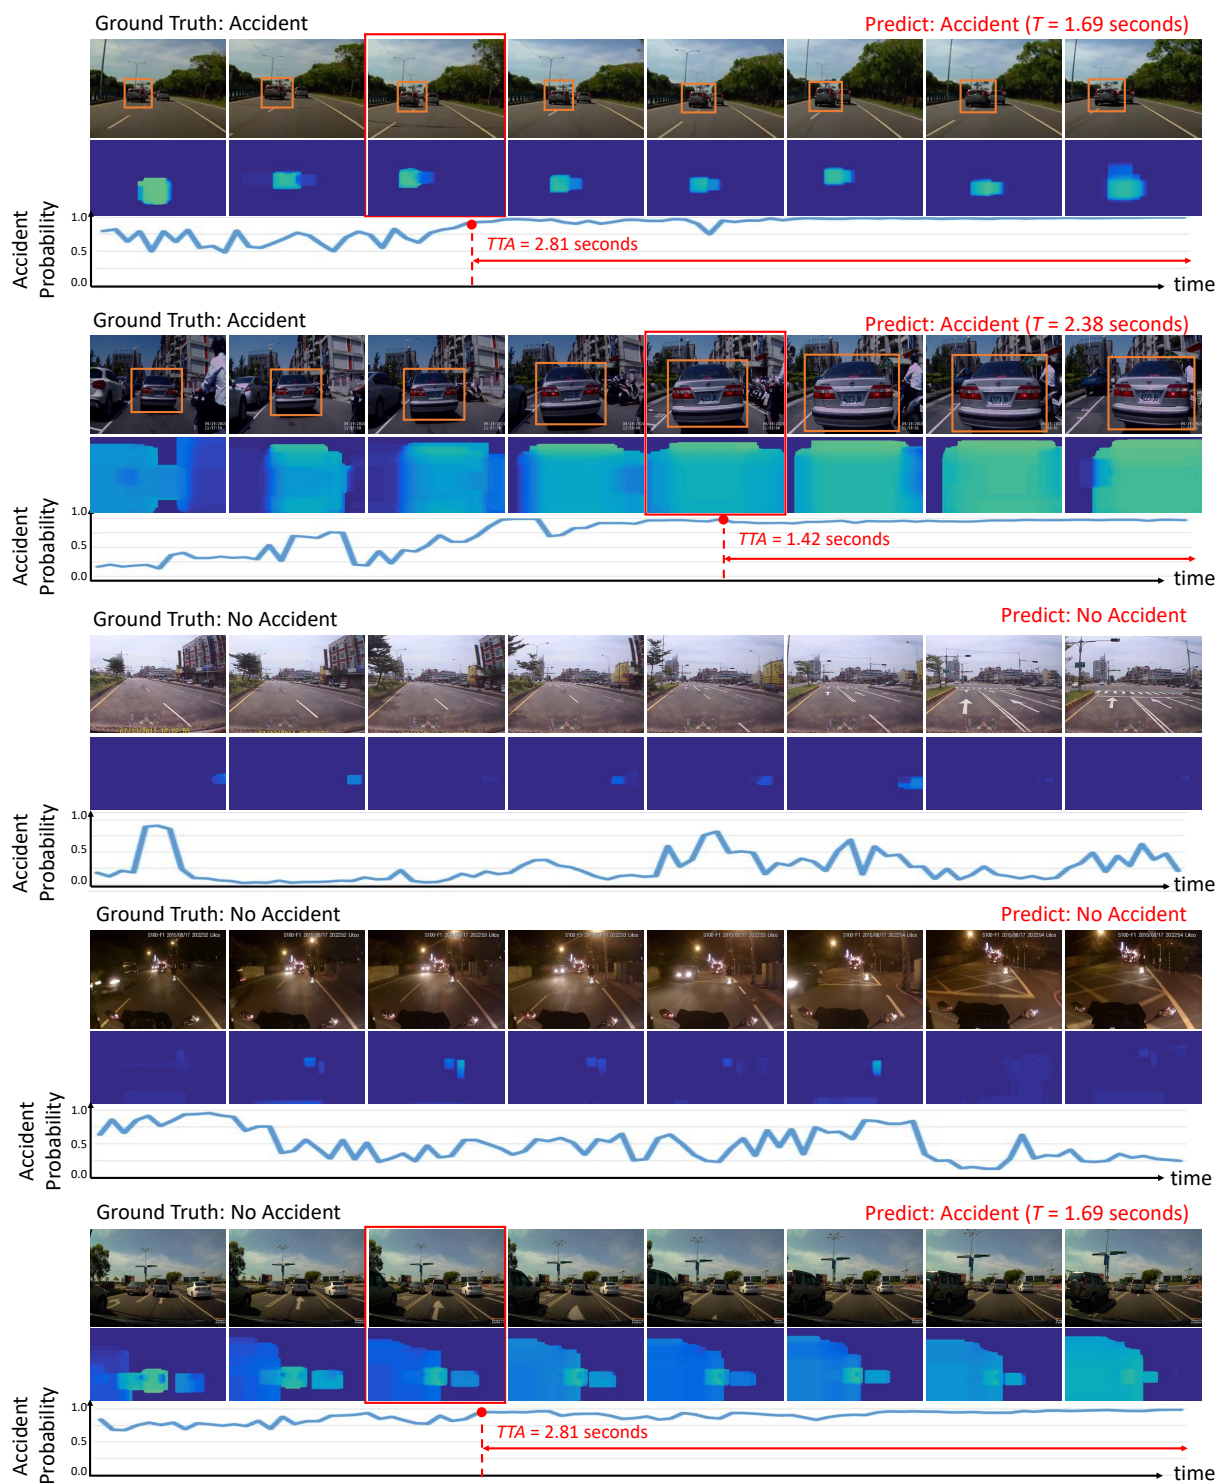

Figure 7. Qualitative Results for SA dataset. The first and second one are positive examples. The third and the fourth one are negative examples. The last one is the failure case. The reason for the failure case is that the three cars in the front are too close so that the model may attempt to recognize one of them is risky region.
